# Supplementary material
Source: HighWire-hosted journal article supplement (https://cmajopen.ca/highwire/filestream/81317/field_highwire_adjunct_files/0/2018-0188-1-at.pdf)
Supplement: 2018-0188-1-at.pdf [file 2018-0188-1-at.pdf]

**Appendix 1 (as supplied by the authors): Patients who underwent neurosurgical intervention**

GCS- Glasgow Coma Scale, aSDH- Acute Subdural Hematoma, SAH- Subarachnoid Hemorrhage, CT- Computed Tomography, EVD- External Ventricular Drain, ICP- Intracranial Pressure, EDH- epidural hematoma, OR- Operation.

| Patient ID | Age | Initial GCS | Trauma                             | Initial head CT                                                           | # of head CTs | OR                                                                                           | Indication for operation                                                               | Discharge disposition         |
|------------|-----|-------------|------------------------------------|---------------------------------------------------------------------------|---------------|----------------------------------------------------------------------------------------------|----------------------------------------------------------------------------------------|-------------------------------|
| 1          | 55  | 15          | Fall from one flight of stairs     | Left frontotemporal contusion, aSDH and traumatic SAH                     | 7             | Left decompressive hemicraniectomy for evacuation of aSDH, frontal + temporal contusion, EVD | Decline in GCS on same day as admission, repeat scan showed increase in contusion size | Inpatient Rehab               |
| 2          | 60  | 13          | Fall off a ladder                  | Right 5 mm aSDH, traumatic SAH, small right frontal + temporal contusions | 6             | Right hemicraniectomy for evacuation of ICH, subdural ICP monitor                            | Decline in GCS on same day as admission, repeat CT: increase in size of contusions     | Repatriation to home hospital |
| 3          | 64  | 13          | Fall down stairs while intoxicated | Bilateral aSDH hematoma, left temporoparietal contusion                   | 3             | Left craniotomy for evacuation of temporoparietal contusion, aSDH, EVD                       | Decline in GCS morning after admission, repeat CT: enlarged left parietal contusion    | Inpatient rehab               |
| 4          | 47  | 15          | Pedestrian struck by train         | Right frontal + temporal contusions, traumatic SAH                        | 8             | Right decompressive hemicraniectomy, evacuation of right frontal + temporal ICH, aSDH, EVD   | Decline in GCS, repeat CT: expansion of right frontal + temporal contusions            | Deceased                      |
| 5          | 84  | 15          | Fall from standing height          | Left convexity and tentorial aSDH                                         | 3             | Left posterior craniotomy for evacuation of tentorial SDH                                    | Decline in GCS 72h after admission, repeat CT: enlargement of SDH                      | Inpatient rehab               |
